# Supplementary material for: Microchip electrophoresis utilizing an in situ photopolymerized Phos-tag binding polyacrylamide gel for specific entrapment and analysis of phosphorylated compounds
Source: Royal Society of Chemistry journal article supplement (doi:10.1039/c7an00836h), 2017-01-01
Supplement: c7an00836h1.pdf [file c7an00836h1.pdf]

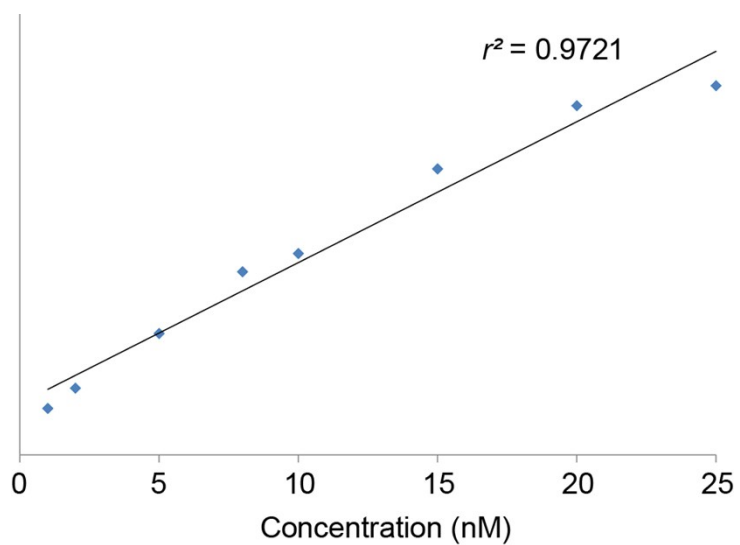

Fig. S1 Calibration plots for quantitation of GS peptide with Phos-tag acrylamide gel under optimized experimental conditions.

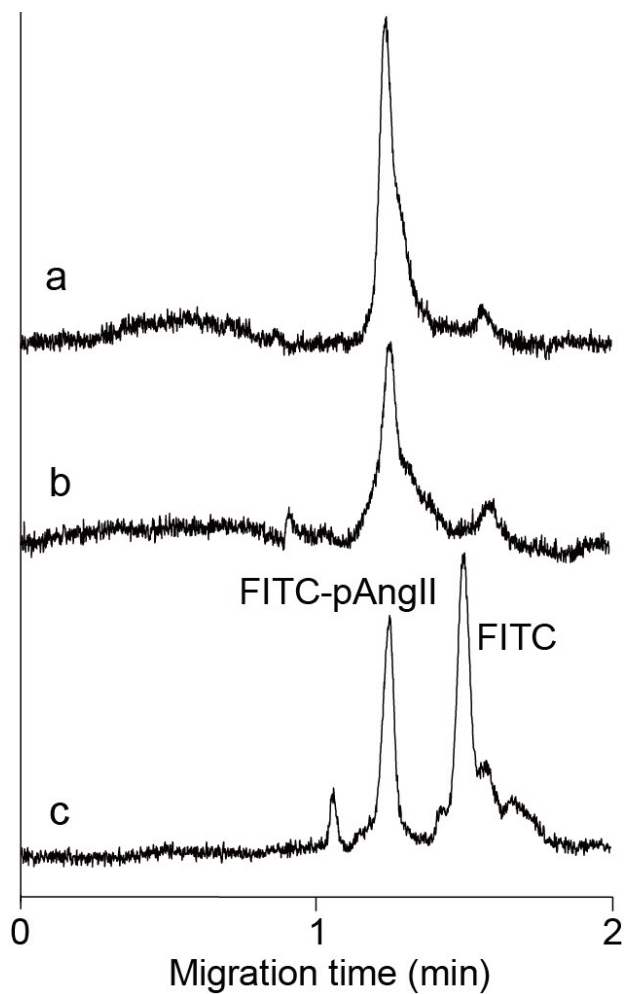

Fig. S2. Electrophoretic separation of  $10^{-8}$  M FITC-labeled phosphoangiotensin II (FITC-pAng II) pre-concentrated with the Phos-tag polyacrylamide gel using manganese(II) (a) and zinc(II) (b) for online concentration and  $10^{-6}$  M FITC-pAng II analyzed by the pinched injection without pre-concentration (c). The analytical conditions were the identical to those described for Fig. 4.
